# Supplementary material for: The COVID-19 pandemic preparedness simulation tool: CovidSIM
Source: Springer Nature journal article supplement (doi:10.1186/s12879-020-05566-7), 2020-11-19
Supplement: MOESM2 [file 18603686]

## Additional file 2 — Mathematical description of derived quantities

The number of symptomatic infections at time  $t$ ,  $I_{\text{Sick}}(t)$ , are given in equation (??). Similarly, the number of asymptomatic cases is given by

$$I_{\text{Asympt}}(t) = (1 - f_{\text{Sick}}) \sum_{k=1}^{n_I} I_k(t). \quad (1)$$

The number of cases in quarantine wards and home isolation are given by equations (??) and (??), respectively.

For public-health management, the numbers of cases that lead to medical consultations or to hospitalization are important. CovidSIM assumes that a fraction  $f_{\text{MC}}$  of individuals in the final infectious period with symptomatic infections seeks medical help. The number of individuals at time  $t$  seeking medical help is, thus,

$$I_{\text{MC}}(t) = f_{\text{MC}} f_{\text{Sick}} \sum_{k=1}^{n_I} I_k(t). \quad (2)$$

Similarly, a fraction  $f_{\text{Hosp}}$  of symptomatic cases are hospitalized, so that their total number at time  $t$  is

$$I_{\text{Hosp}}(t) = f_{\text{Hosp}} f_{\text{Sick}} \sum_{k=1}^{n_I} I_k(t). \quad (3)$$

Furthermore, a fraction  $f_{\text{ICU}}$  of hospitalized individuals need treatment at ICUs, so that the number of these patients is

$$I_{\text{ICU}}(t) = f_{\text{ICU}} f_{\text{Hosp}} f_{\text{Sick}} \sum_{k=1}^{n_I} I_k(t). \quad (4)$$

The cumulative number of new infections occurring in the time interval from  $t_1$  to  $t_2$  is

$$N_{\text{Inf}}(t_1, t_2) = \int_{t_1}^{t_2} \frac{S(t)}{N} \left( (1 - p_{\text{Dist}}(t)) (\beta_P(t) + \beta_I(t) I_{\text{Eff}}(t)) + \lambda_{\text{Ext}} \right) dt. \quad (5)$$

Similarly, the number of symptomatic infections occurring between times  $t_1$  and  $t_2$  is derived by

$$N_{\text{Sick}}(t_1, t_2) = \int_{t_1}^{t_2} f_{\text{Sick}} \varphi P_{n_P}(t) dt. \quad (6)$$

Following the same logic, the cumulative numbers of medical consultations or of hospitalizations and ICU admissions between time  $t_1$  and  $t_2$  are, respectively,

$$N_{\text{Cons}}(t_1, t_2) = \int_{t_1}^{t_2} f_{\text{Sick}} f_{\text{Consult}} \varphi P_{n_P}(t) dt, \quad (7)$$

$$N_{\text{Hosp}}(t_1, t_2) = \int_{t_1}^{t_2} f_{\text{Sick}} f_{\text{Hosp}} \varphi P_{n_P}(t) dt, \quad (8)$$

and

$$N_{\text{ICU}}(t_1, t_2) = \int_{t_1}^{t_2} f_{\text{Sick}} f_{\text{Hosp}} f_{\text{ICU}} \varphi P_{n_P}(t) dt. \quad (9)$$

Finally, the number of deaths occurring in the time interval  $[t_1, t_2]$  is

$$N_{\text{Death}}(t_1, t_2) = \int_{t_1}^{t_2} f_{\text{Sick}} f_{\text{Dead}} \gamma I_{n_I}(t) dt. \quad (10)$$
